# Supplementary material
Source: publisher figshare collection journal article supplement (https://acs.figshare.com/ndownloader/files/4589485)
Supplement: Supplementary file 1 [file 4589485]

## Heterotrimeric Coiled Coils with Core Residue Urea Side Chains

Maria L. Diss and Alan J. Kennan\*

Department of Chemistry, Colorado State University, Fort Collins, Colorado 80523

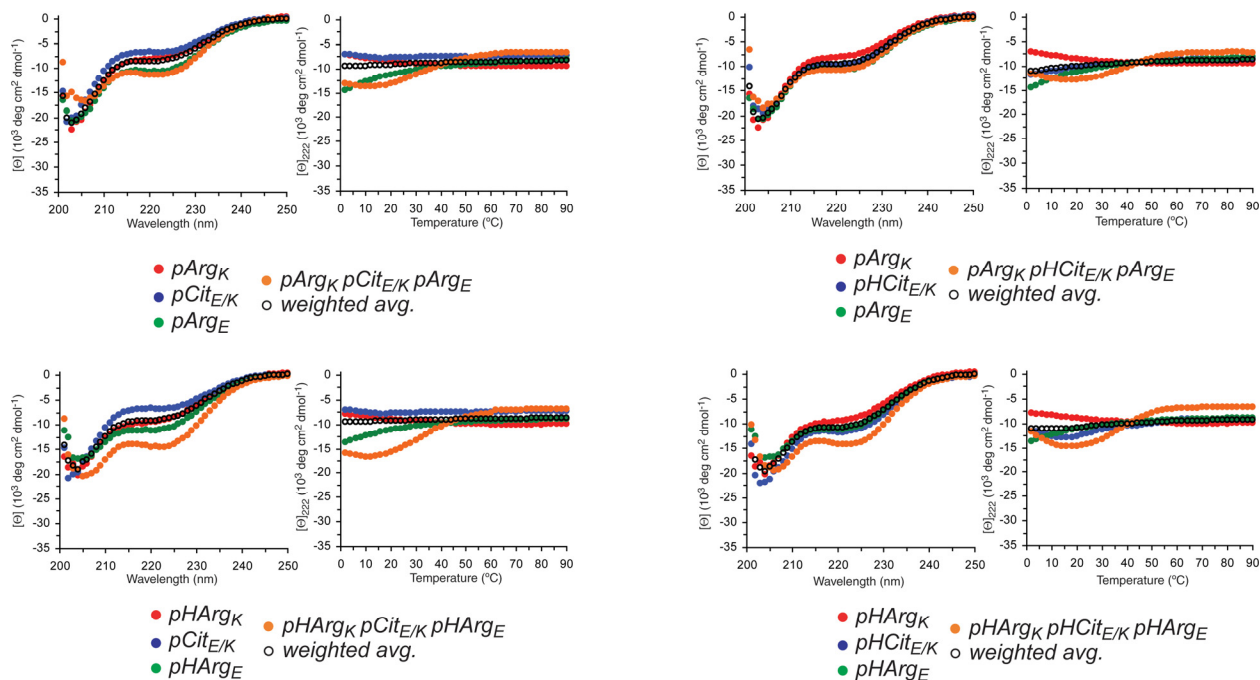

**Figure S-1:** Double guanidine cores. Wavelength (left) and thermal denaturation (right) CD spectra for pure solutions of the indicated peptides (red, blue, green) and corresponding 1:1 mixtures (orange), along with the calculated weighted average signal (open circles). All solutions are 10  $\mu\text{M}$  total peptide solution in PBS buffer (150 mM NaCl, 10 mM phosphate, pH = 7.0). Wavelength traces were taken at 25  $^{\circ}\text{C}$ .

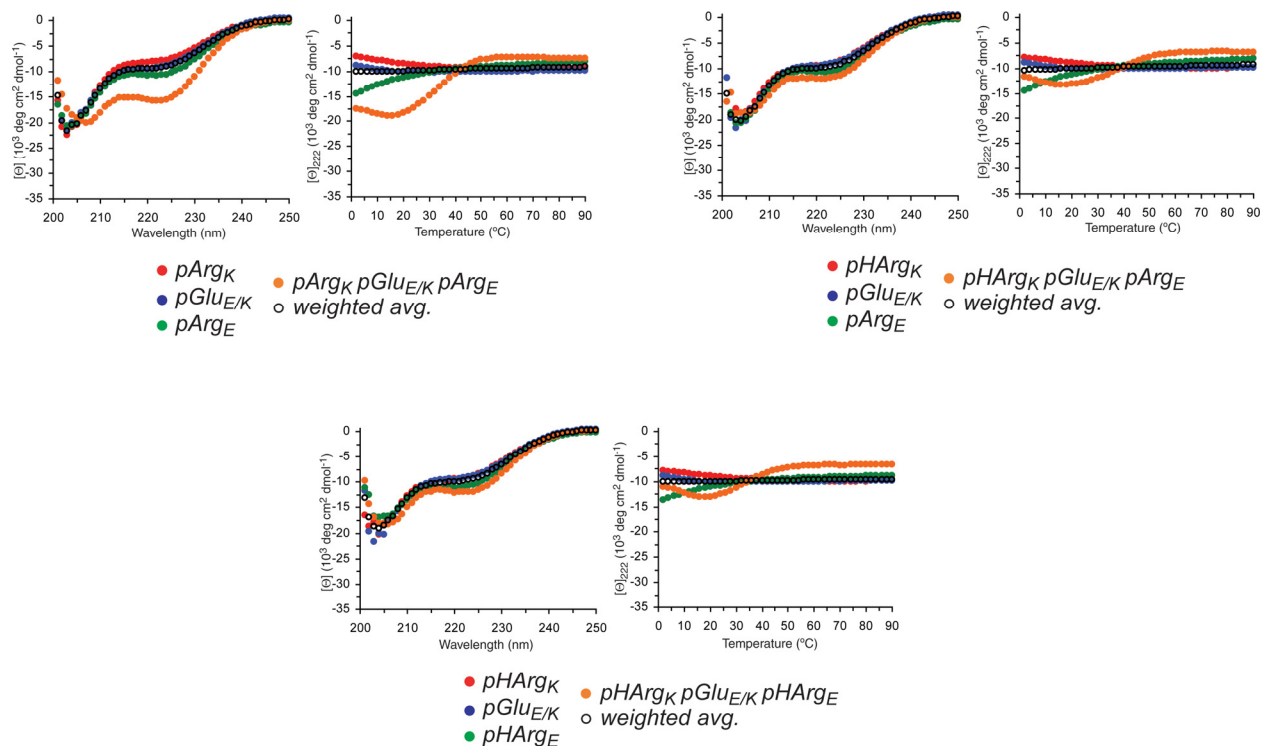

**Figure S-2:** Double guanidine cores with a carboxylate as the third residue. Wavelength (left) and thermal denaturation (right) CD spectra for pure solutions of the indicated peptides (red, blue, green) and corresponding 1:1 mixtures (orange), along with the calculated weighted average signal (open circles). All solutions are 10  $\mu\text{M}$  total peptide solution in PBS buffer (150 mM NaCl, 10 mM phosphate, pH = 7.0). Wavelength traces were taken at 25  $^{\circ}\text{C}$ .
